# Supplementary material
Source: PubMed Central journal article supplement (PMC3501340)
Supplement: NIHMS403958-supplement-Supp_Figure_S1-S3_Table_S1-S3.pdf [file NIHMS403958-supplement-Supp_Figure_S1-S3_Table_S1-S3.pdf]

1 **Surface sensing and lateral subcellular localization of WspA, the receptor in a**  
 2 **chemosensory-like system leading to c-di-GMP production.**

3 Jennifer R. O'Connor, Nathan J. Kuwada, Varisa Huangyutitham, Paul A. Wiggins and Caroline  
 4 S. Harwood.

5 **Table S1: Bacterial strains used in this study.**

| <i>Pseudomonas aeruginosa</i> strains | Genotype                                     | Reference/source               |
|---------------------------------------|----------------------------------------------|--------------------------------|
| PAO1                                  | Wild-type                                    | (Stover <i>et al.</i> , 2000)  |
| PAO1 <i>mCherry-mreB</i>              | PAO1attB::pSWmCherry-mreB                    | (Cowles & Gitai, 2010)         |
| PAO1100                               | $\Delta$ wspF                                | (Hickman <i>et al.</i> , 2005) |
| PAO1101                               | $\Delta$ wspA                                | (Hickman <i>et al.</i> , 2005) |
| PAO1251                               | <i>wspR-yfp</i>                              | (Guvener & Harwood, 2007)      |
| PAO1252                               | PAO1101, <i>wspR-yfp</i>                     | (Guvener & Harwood, 2007)      |
| PAO1254                               | $\Delta$ wspF <i>wspR-yfp</i>                | (Guvener & Harwood, 2007)      |
| PAO1260                               | $\Delta$ wspA, $\Delta$ wspF <i>wspR-yfp</i> | (Guvener & Harwood, 2007)      |
| PAO1275                               | <i>wspA-yfp</i>                              | (Guvener & Harwood, 2007)      |
| PAO1276                               | $\Delta$ wspE <i>wspA-yfp</i>                | (Guvener & Harwood, 2007)      |
| CSH25                                 | PAO1251 $\Delta$ wspC                        | This study                     |
| CSH27                                 | PAO1254 $\Delta$ wspC                        | This study                     |
| CSH75                                 | PAO1251 <i>pctA-wspA</i>                     | This study                     |
| CSH76                                 | PAO1254 <i>pctA-wspA</i>                     | This study                     |
| CSH169                                | PAO1251 <i>wspC<math>\Delta</math>TPR</i>    | This study                     |
| CSH171                                | PAO1254 <i>wspC<math>\Delta</math>TPR</i>    | This study                     |
| CSH199                                | PAO1251 <i>wspE<math>\Delta</math>REC</i>    | This study                     |
| CSH252                                | PAO1254 <i>wspE<math>\Delta</math>REC</i>    | This study                     |
| CSH285                                | PAO1 <i>wspA-CFP</i>                         | This study                     |
| CSH292                                | CSH75 <i>pctA-wspA-cfp</i>                   | This study                     |
| CSH295                                | CSH76 <i>pctA-wspA-cfp</i>                   | This study                     |
| CSH366                                | PAO1251 <i>pctC-wspA</i>                     | This study                     |
| CSH368                                | PAO1254 <i>pctC-wspA</i>                     | This study                     |
| CSH373                                | PAO1251 PA2652- <i>wspA</i>                  | This study                     |
| CSH375                                | PAO1254 PA2652- <i>wspA</i>                  | This study                     |
| CSH377                                | PAO1251 <i>pctB-wspA</i>                     | This study                     |
| CSH379                                | PAO1254 <i>pctB-wspA</i>                     | This study                     |
| CSH382                                | CSH366 <i>pctC-wspA-cfp</i>                  | This study                     |
| CSH383                                | CSH368 <i>pctC-wspA-cfp</i>                  | This study                     |
| CSH385                                | CSH373 PA2652- <i>wspA-cfp</i>               | This study                     |
| CSH386                                | CSH375 PA2652- <i>wspA-cfp</i>               | This study                     |
| CSH387                                | CSH377 <i>pctB-wspA-cfp</i>                  | This study                     |
| CSH388                                | CSH379 <i>pctB-wspA-cfp</i>                  | This study                     |
| CSH448                                | PAO1 <i>pctB-yfp</i>                         | This study                     |
| CSH477                                | PAO1 <i>pctA-yfp</i>                         | This study                     |
| CSH504                                | PAO1 <i>wspA-pctA-yfp</i>                    | This study                     |
| CSH627                                | PAO1275 $\Delta$ wspD                        | This study                     |
| CSH628                                | PAO1254 $\Delta$ wspD                        | This study                     |
| CSH676                                | PAO1101attB::MINICTX2                        | This study                     |
| CSH687                                | PAO1101attB::MINICTX2- <i>wspA-yfp</i>       | This study                     |
| CSH691                                | PAO1101attB::MINICTX2- <i>wspA-5-yfp</i>     | This study                     |
| CSH704                                | PAO1251 $\Delta$ wspB                        | This study                     |
| CSH705                                | PAO1254 $\Delta$ wspB                        | This study                     |
| CSH709                                | PAO1275 $\Delta$ wspB                        | This study                     |
| CSH712                                | PAO1251 $\Delta$ wspD                        | This study                     |
| CSH954                                | CSH687 $\Delta$ wspE                         | This study                     |
| CSH956                                | CSH691 $\Delta$ wspE                         | This study                     |

| <b><i>Escherichia coli</i> strains</b> | <b>Characteristics/Genotype</b>                                                                                                         | <b>Reference/source</b>      |
|----------------------------------------|-----------------------------------------------------------------------------------------------------------------------------------------|------------------------------|
| DH5α                                   | Used for cloning purposes                                                                                                               | Gibco BRL                    |
| S17-1                                  | Donor strain for conjugal transfer of plasmids to <i>P. aeruginosa</i> .                                                                | (Simon <i>et al.</i> , 1983) |
| NEB5α <i>F' lacI<sup>f</sup></i>       | Used for cloning purposes                                                                                                               | NEB                          |
| HCB437                                 | Chemotaxis deficient strain:<br>Δ( <i>tsr</i> )7021 Δ( <i>trg</i> )100 <i>zbd::TnS</i> Δ( <i>cheA-cheZ</i> )2209<br><i>metF</i> 159(Am) | (Wolfe <i>et al.</i> , 1987) |
| RP437                                  | Chemotaxis proficient strain background                                                                                                 | (Parkinson, 1978)            |
| CSH658                                 | HCB437 (MINICTX2)                                                                                                                       | This study                   |
| CSH659                                 | HCB437 (MINICTX2- <i>wspA-yfp</i> )                                                                                                     | This study                   |
| CSH661                                 | HCB437 (MINICTX2- <i>wspA-5-yfp</i> )                                                                                                   | This study                   |
| CSH737                                 | RP437 (MINICTX2)                                                                                                                        | This study                   |
| CSH741                                 | RP437 (MINICTX2- <i>wspA-yfp</i> )                                                                                                      | This study                   |
| CSH745                                 | RP437 (MINICTX2- <i>wspA-5-yfp</i> )                                                                                                    | This study                   |

6

7

8 Table S2: Plasmids used in this study

| Plasmid name                                         | Use/Characteristics                                                                                                                                                                                                                                                                                                                                                                                                                                                                                               | Reference/source             |
|------------------------------------------------------|-------------------------------------------------------------------------------------------------------------------------------------------------------------------------------------------------------------------------------------------------------------------------------------------------------------------------------------------------------------------------------------------------------------------------------------------------------------------------------------------------------------------|------------------------------|
| pEX18Gm                                              | <i>P. aeruginosa</i> suicide vector for construction of in-frame insertion/deletion/replacement mutants.                                                                                                                                                                                                                                                                                                                                                                                                          | (Hoang <i>et al.</i> , 1998) |
| pEX19Gm                                              | <i>P. aeruginosa</i> suicide vector for construction of in-frame insertion/deletion/replacement mutants.                                                                                                                                                                                                                                                                                                                                                                                                          | (Hoang <i>et al.</i> , 1998) |
| pEX18Gm <i>wspA-pctA</i>                             | For replacement of <i>wspA</i> with <i>wspA-pctA</i> fusion in native <i>wspA</i> location on chromosome. The 5' end of <i>wspA</i> (encoding WspA <sub>1-258</sub> ) was fused to 3' end of <i>pctA</i> (encoding PctA <sub>346-629</sub> ). 5' <i>wspA</i> amplified with primers CHP248/250, 3' <i>pctA</i> amplified with CHP251/252, <i>wspB</i> amplified with CHP253/249. The three PCR products were fused together and inserted <i>HindIII/BamHI</i> into pEX18Gm using In Fusion cloning kit.           | This study                   |
| pEX18Gm <i>wspA-pctA-yfp</i>                         | For construction of <i>wspA-pctA-yfp</i> fusion in <i>wspA</i> native location in <i>wsp</i> locus. <i>pctA</i> fragment PCR amplified with CHP246/244, 5-glycine linker- <i>yfp</i> fragment amplified from pEX19GmEYFP with CHP173/174, <i>wspB</i> fragment amplified with CHP270/249. Fragments fused together and inserted into <i>HindIII/BamHI</i> sites of pEX18Gm using In Fusion cloning.                                                                                                               | This study                   |
| pEX18Gm <i>wspE</i> ΔREC in Δ <i>wspF</i> background | Suicide vector to generate in-frame deletion of <i>wspE</i> REC domain. Upstream <i>wspE</i> REC PCR amplified with CHP87/90, downstream <i>wspE</i> REC amplified with CHP89/ <i>wspF</i> reverse. SOE PCR product amplified with CHP87/ <i>wspF</i> reverse and cloned <i>HindIII/BamHI</i> into the same sites of pEX18Gm.                                                                                                                                                                                     | This study                   |
| pEX19Gm <i>pctA-yfp</i>                              | For construction of chromosomal fusion of <i>yfp</i> to 3' end of <i>pctA</i> in native <i>pctA</i> location. <i>pctA</i> fragment amplified with CHP246/244, 5-glycine linker- <i>yfp</i> fragment amplified from pEX19GmEYFP with CHP173/174, DNA downstream of <i>pctA</i> amplified with CHP245/247. Fragments fused together and inserted into <i>HindIII/BamHI</i> sites of pEX19Gm using In Fusion cloning.                                                                                                | This study                   |
| pEX19Gm <i>pctA-wspA</i>                             | For replacement of <i>wspA</i> with <i>pctA-wspA</i> fusion in native <i>wspA</i> location on chromosome. The 5' end of <i>pctA</i> (encoding PctA <sub>1-345</sub> ) was fused to 3' end of <i>wspA</i> (encoding WspA <sub>259-542</sub> ). <i>wspA</i> upstream region amplified with primers CHP13/59, 5' <i>pctA</i> amplified with CHP58/61, 3' <i>wspA</i> amplified with CHP60/14. The three PCR products were fused together and inserted <i>HindIII/BamHI</i> into pEX19Gm using In Fusion cloning kit. | This study                   |
| pEX19Gm <i>pctB-wspA</i>                             | For replacement of <i>wspA</i> with <i>pctB-wspA</i> fusion in native <i>wspA</i> location on chromosome. The 5' end of <i>pctB</i> (encoding PctB <sub>2-345</sub> ) was fused to 3' end of <i>wspA</i> (encoding WspA <sub>259-542</sub> ). <i>wspA</i> upstream region amplified with primers CHP13/211, 5' <i>pctB</i> amplified with CHP213/214, 3' <i>wspA</i> amplified with CHP212/14. The three PCR products were fused together and inserted                                                            | This study                   |

|                                                                                               |                                                                                                                                                                                                                                                                                                                                                                                                                                                                                                                                |            |
|-----------------------------------------------------------------------------------------------|--------------------------------------------------------------------------------------------------------------------------------------------------------------------------------------------------------------------------------------------------------------------------------------------------------------------------------------------------------------------------------------------------------------------------------------------------------------------------------------------------------------------------------|------------|
|                                                                                               | <i>HindIII/BamHI</i> into pEX19Gm using In Fusion cloning kit.                                                                                                                                                                                                                                                                                                                                                                                                                                                                 |            |
| pEX19Gm <i>pctC-wspA</i>                                                                      | For replacement of <i>wspA</i> with <i>pctC-wspA</i> fusion in native <i>wspA</i> location on chromosome. The 5' end of <i>pctC</i> (encoding PctC <sub>2-348</sub> ) was fused to 3' end of <i>wspA</i> (encoding WspA <sub>259-542</sub> ). <i>wspA</i> upstream region amplified with primers CHP13/211, 5' <i>pctC</i> fragment amplified with CHP215/216, 3' <i>wspA</i> amplified with CHP212/14. The three PCR products were fused together and inserted <i>HindIII/BamHI</i> into pEX19Gm using In Fusion cloning kit. | This study |
| pEX19Gm PA2652- <i>wspA</i>                                                                   | For replacement of <i>wspA</i> with PA2652- <i>wspA</i> fusion in native <i>wspA</i> location on chromosome. The 5' end of PA2652 (encoding PA2652 <sub>2-277</sub> ) was fused to 3' end of <i>wspA</i> (encoding WspA <sub>259-542</sub> ). <i>wspA</i> upstream region amplified with primers CHP13/211, 5' PA2652 amplified with CHP217/218, 3' <i>wspA</i> amplified with CHP212/14. The three PCR products were fused together and inserted <i>HindIII/BamHI</i> into pEX19Gm using In Fusion cloning kit.               | This study |
| pEX19Gm <i>pctB-yfp</i>                                                                       | For construction of <i>pctB-yfp</i> fusion in native <i>pctB</i> location on chromosome. <i>pctB</i> was PCR amplified with primers <i>pctB_F</i> and <i>pctB_R</i> , then cloned <i>EcoRI/KpnI</i> into the same sites of pEX19Gm EYFP, resulting in pEX19Gm <i>pctBUP-yfp</i> . Then the region downstream of <i>pctB</i> was PCR amplified with primers <i>pctBdown_F/pctBdown_R</i> and cloned <i>XbaI/HindIII</i> into the same sites of pEX19Gm <i>pctBUP-yfp</i> , resulting in pEX19Gm <i>pctB-yfp</i> .               | This study |
| pEX19Gm $\Delta$ <i>wspB</i> (for <i>wspB</i> deletion in a background with WT <i>wspA</i> )  | Suicide vector to construct in-frame deletion of <i>wspB</i> in WT <i>wspA</i> background. Upstream <i>wspB</i> PCR amplified with CHP339/342, downstream <i>wspB</i> PCR amplified with CHP341/340. SOE PCR product amplified with CHP339/340 and cloned <i>KpnI/HindIII</i> into the same sites of pEX19Gm.                                                                                                                                                                                                                  | This study |
| pEX19Gm $\Delta$ <i>wspB</i> (for <i>wspB</i> deletion in a background with <i>wspA-yfp</i> ) | Suicide vector to construct in-frame deletion of <i>wspB</i> in a <i>wspA-yfp</i> background. Upstream <i>wspB</i> PCR amplified with CHP167/ WspB-YFP-upR from PAO1275, downstream <i>wspB</i> PCR amplified with WspBdownF/CHP340. SOE PCR product amplified with CHP167/340 and cloned <i>Blunt/HindIII</i> into the <i>XmnI/HindIII</i> sites of pEX19Gm.                                                                                                                                                                  | This study |
| pEX19Gm $\Delta$ <i>wspC</i>                                                                  | Suicide vector to generate in-frame deletion of <i>wspC</i> . Upstream <i>wspC</i> PCR amplified with CHP1/48, downstream <i>wspC</i> amplified with CHP47/4. SOE PCR product amplified with CHP1/4 and cloned <i>HindIII/BamHI</i> into the same sites of pEX19Gm.                                                                                                                                                                                                                                                            | This study |
| pEX19Gm $wspC\Delta$ TPR                                                                      | Suicide vector to generate in-frame deletion of <i>wspC</i> TPR domain. Upstream <i>wspCTPR</i> PCR amplified with CHP102/104, downstream <i>wspCTPR</i> amplified with CHP103/4. SOE PCR product amplified with CHP102/4 and cloned <i>HindIII/BamHI</i> into the same sites of pEX19Gm.                                                                                                                                                                                                                                      | This study |
| pEX19Gm $\Delta$ <i>wspD</i>                                                                  | Suicide vector to generate in-frame deletion of <i>wspD</i> . Upstream <i>wspD</i> PCR amplified with CHP303/323, downstream <i>wspD</i> amplified                                                                                                                                                                                                                                                                                                                                                                             | This study |

|                                      |                                                                                                                                                                                                                                                                                                                                                                                                                                                                                                                                                                                                 |                           |
|--------------------------------------|-------------------------------------------------------------------------------------------------------------------------------------------------------------------------------------------------------------------------------------------------------------------------------------------------------------------------------------------------------------------------------------------------------------------------------------------------------------------------------------------------------------------------------------------------------------------------------------------------|---------------------------|
|                                      | with CHP322/304. SOE PCR product amplified with CHP303/304 and cloned <i>Bam</i> HI/ <i>Hind</i> III into the same sites of pEX19Gm.                                                                                                                                                                                                                                                                                                                                                                                                                                                            |                           |
| pEX19GmΔ <i>wspE</i>                 | Suicide vector for in-frame deletion of <i>wspE</i>                                                                                                                                                                                                                                                                                                                                                                                                                                                                                                                                             | (Hickman et al., 2005)    |
| pEX19Gm <i>wspE</i> ΔREC             | Suicide vector to generate in-frame deletion of <i>wspE</i> REC domain. Upstream <i>wspE</i> REC PCR amplified with CHP87/90, downstream <i>wspE</i> REC amplified with CHP89/88. SOE PCR product amplified with CHP87/88 and cloned <i>Hind</i> III/ <i>Bam</i> HI into the same sites of pEX19Gm.                                                                                                                                                                                                                                                                                             | This study                |
| pEX19GmEYFP                          | Cloning vector for construction of <i>eyfp</i> fusion suicide vectors.                                                                                                                                                                                                                                                                                                                                                                                                                                                                                                                          | (Guvener et al., 2006)    |
| pEYFP                                | Cloning/expression vector encoding EYFP                                                                                                                                                                                                                                                                                                                                                                                                                                                                                                                                                         | Clontech                  |
| pEX19Gm <i>wspA-yfp</i>              | For construction of <i>wspA-yfp</i> fusions in native <i>wspA</i> location on the chromosome.                                                                                                                                                                                                                                                                                                                                                                                                                                                                                                   | (Guvener & Harwood, 2007) |
| pEX19Gm <i>wspA-cfp</i>              | For construction of <i>wspA-cfp</i> fusions in native <i>wspA</i> location on the chromosome.                                                                                                                                                                                                                                                                                                                                                                                                                                                                                                   | (Guvener & Harwood, 2007) |
| pUC57-3' <i>wspA</i> -4 mutations    | Synthetic <i>wspA</i> 3' fragment, encoding 4 amino acid mutations, cloned <i>Eco</i> RI/ <i>Hind</i> III into pUC57. See fig. S3 for description of mutations.                                                                                                                                                                                                                                                                                                                                                                                                                                 | Genewiz Inc.              |
| MINICTX2                             | <i>E. coli</i> - <i>P. aeruginosa</i> shuttle vector that integrates into the <i>attB</i> site of <i>P. aeruginosa</i> by site-specific recombination.                                                                                                                                                                                                                                                                                                                                                                                                                                          | (Hoang et al., 2000)      |
| MINICTX2- <i>wspA-yfp</i>            | PCR amplified <i>wspA</i> including native promoter using primers CHP336/292, PCR amplified 5-glycine linker- <i>yfp</i> from pEYFP using primers CHP173/335, fragments fused together and inserted into MINICTX2 <i>Bam</i> HI/ <i>Kpn</i> I using In Fusion cloning.                                                                                                                                                                                                                                                                                                                          | This study                |
| MINICTX2- <i>wspA</i>                | PCR amplified <i>wspA</i> including native promoter using primers CHP336/334 and cloned <i>Bam</i> HI/ <i>Kpn</i> I into the same sites of MINICTX2.                                                                                                                                                                                                                                                                                                                                                                                                                                            | This study                |
| MINICTX2- <i>wspA</i> -5- <i>yfp</i> | PCR amplified <i>wspA</i> 5' and native promoter using primers CHP336/338, PCR amplified 3' <i>wspA</i> -4 mutations from pUC57-3' <i>wspA</i> -4 mutations using CHP337/334. <i>wspA</i> -5 mutations SOE PCR product then generated with CHP336/292, which excluded the stop codon. PCR amplified 5-glycine linker- <i>yfp</i> from pEYFP using primers CHP173/335. SOE PCR and 5-glycine linker- <i>yfp</i> fragment fused together and inserted into MINICTX2 <i>Bam</i> HI/ <i>Kpn</i> I using In Fusion cloning. See Fig. S3 for detailed description of the location of the 5 mutations. | This study                |
| MINICTX2- <i>wspA</i> -5             | PCR amplified <i>wspA</i> -5 including native promoter from MINICTX2- <i>wspA</i> -5- <i>yfp</i> using CHP336/334. Product cloned <i>Kpn</i> I/ <i>Bam</i> HI into the same sites of MINICTX2. See Fig. S3 for detailed description of the location of the 5 mutations.                                                                                                                                                                                                                                                                                                                         | This study                |

9

10

11 **Table S3: Primers used in this study.**

| Primer number | Sequence                                                 | Use                                                                                                                                                | Source/Reference |
|---------------|----------------------------------------------------------|----------------------------------------------------------------------------------------------------------------------------------------------------|------------------|
| CHP1          | 5'-TTTAAAGCTTAAGTCTGAGGCTGTGACCGTGT-3'                   | Construction of pEX19GmΔwspC                                                                                                                       | This study       |
| CHP4          | 5'-AATTGGATCCCGGAAATGATCAGCATGCGCGGAACC-3'               | Construction of pEX19GmΔwspC and pEX19GmwspCΔTPR                                                                                                   | This study       |
| CHP13         | 5'-TATGACCATGATTACGCCAAGCTTCTGGCGGCGCTGATGGTCGAACTGTT-3' | Construction of pEX19Gm <i>pctA-wspA</i> , pEX19Gm <i>pctB-wspA</i> , pEX19Gm <i>pctC-wspA</i> , pEX19Gm PA2652- <i>wspA</i>                       | This study       |
| CHP14         | 5'-TTCGAGCTCGGTACCCGGGGATCCTCAGACTTTGAAGCGGATACG-3'      | Construction of pEX19Gm <i>pctA-wspA</i> , pEX19Gm <i>pctB-wspA</i> , pEX19Gm <i>pctC-wspA</i> , pEX19Gm PA2652- <i>wspA</i> , pPSV35- <i>wspA</i> | This study       |
| CHP47         | 5'-GGGACGGCATGAACGATCGCTTCCAGCAACGTGCGGCCGTGGAG-3'       | Construction of pEX19GmΔwspC                                                                                                                       | This study       |
| CHP48         | 5'-CTCCACGGGCCGACGTTGCTGGAAGCGATCGTTCATGCCGTCCC-3'       | Construction of pEX19GmΔwspC                                                                                                                       | This study       |
| CHP58         | 5'-CGGACTCGAGTCTTGGGGAAAAATATGATCAAAAAGTCTGAAGTTCAGC-3'  | Construction of pEX19Gm <i>pctA-wspA</i>                                                                                                           | This study       |
| CHP59         | 5'-GCTGAACTTCAGACTTTTGATCATAATTTTCCCAAGACTCGAGTCCG-3'    | Construction of pEX19Gm <i>pctA-wspA</i>                                                                                                           | This study       |
| CHP60         | 5'-GATGCCTTCAACCAGTTCGTCGAGGAGCTCAAGGGCCTGGTGTGCAG-3'    | Construction of pEX19Gm <i>pctA-wspA</i>                                                                                                           | This study       |
| CHP61         | 5'-CTGCGACACCAGGCCCTTGAGCTCCTCGAAGAACTGGTTGAAGGCATC-3'   | Construction of pEX19Gm <i>pctA-wspA</i>                                                                                                           | This study       |
| CHP87         | 5'-AATTTAAGCTTTGTTTCACGTCGAGGTGCCGCTGAC-3'               | pEX19GmwspEΔREC                                                                                                                                    | This study       |
| CHP88         | 5'-TTTAAGGATCCTTGCTTGAGCAACACCGCGAGCGAC                  | pEX19GmwspEΔREC                                                                                                                                    | This study       |
| CHP89         | 5'-GCGGGGCGCAACGCAAGCGCGTCGTCGTCCTGATCGGAGA-3'           | pEX19GmwspEΔREC                                                                                                                                    | This study       |
| CHP90         | 5'-TCTCCGATCAGGACGACGACGCGCTTGCGTTGCGCCCCGC-3'           | pEX19GmwspEΔREC                                                                                                                                    | This study       |
| CHP102        | 5'-AATTTAAGCTTCCAGTTGGCCGAGCAGGTTTC-3'                   | pEX19GmwspCΔTPR                                                                                                                                    | This study       |
| CHP103        | 5'-GCGGCCAGCCCCTCGCCAGTCAGCAACGTGCGGCCGTGG-3'            | pEX19GmwspCΔTPR                                                                                                                                    | This study       |
| CHP104        | 5'-CCACGGGCCGACGTTGCTGACTGGCGAGGGGCTGGCCGC-3'            | pEX19GmwspCΔTPR                                                                                                                                    | This study       |
| CHP167        | 5'-GTGAGCAAGGGCGAGGAGCTGTTTC-3'                          | Construction of pEX19Gm ΔwspB (for <i>wspB</i> deletion in a background with <i>wspA-yfp</i> )                                                     | This study       |
| CHP173        | 5'-GGCGGTGGCGGTGGCGTGAGCAAGGGCGAGGAG-3'                  | Construction of MINICTX2- <i>wspA-yfp</i> and MINICTX2- <i>wspA-5-yfp</i>                                                                          | This study       |
| CHP174        | 5'-CTTGTACAGCTCGTCCATGCCGAGA-3'                          | Construction of pEX19Gm <i>pctA-yfp</i> and pEX18Gm <i>wspA-pctA-yfp</i>                                                                           | This study       |
| CHP211        | 5'-CACATTTTCCCAAGACTCGAGTCCGGATTCGTTCTG-3'               | Construction of pEX19Gm <i>pctB-wspA</i> , pEX19Gm <i>pctC-wspA</i> and pEX19Gm PA2652- <i>wspA</i>                                                | This study       |

|        |                                                             |                                                                                                     |            |
|--------|-------------------------------------------------------------|-----------------------------------------------------------------------------------------------------|------------|
| CHP212 | 5'-GAGCTCAAGGGCCTGGTGCAGG-3'                                | Construction of pEX19Gm <i>pctB-wspA</i> , pEX19Gm <i>pctC-wspA</i> and pEX19Gm PA2652- <i>wspA</i> | This study |
| CHP213 | 5'-TTGGGGAAAAATGTGATCAAAAGTCTCAA<br>GTTTCAGCCA-3'           | Construction of pEX19Gm <i>pctB-wspA</i>                                                            | This study |
| CHP214 | 5'-CAGGCCCTTGAGCTCCTCGACGAAGCGGT<br>TGAAGGAAATG-3'          | Construction of pEX19Gm <i>pctB-wspA</i>                                                            | This study |
| CHP215 | 5'-TTGGGGAAAAATGTGCTTCGCTCGCTGTC<br>GTTTGCCAAG-3'           | Construction of pEX19Gm <i>pctC-wspA</i>                                                            | This study |
| CHP216 | 5'-CAGGCCCTTGAGCTCCTCGACGAAGCGGT<br>TGAAGGCATT-3'           | Construction of pEX19Gm <i>pctC-wspA</i>                                                            | This study |
| CHP244 | 5'-GCCACCGCCACCGCGATCTTGAAGCTGT<br>CCACCA-3'                | Construction of pEX19Gm <i>pctA-yfp</i> and pEX18Gm <i>wspA-pctA-yfp</i>                            | This study |
| CHP245 | 5'-GACGAGCTGTACAAGTGAGACCGCCGG<br>TCTCGTCGCC-3'             | Construction of pEX19Gm <i>pctA-yfp</i>                                                             | This study |
| CHP246 | 5'-GGCCAGTGCCAAGCTTTCGAAGTGATCAA<br>GGGCATCTCCG-3'          | Construction of pEX19Gm <i>pctA-yfp</i> and pEX18Gm <i>wspA-pctA-yfp</i>                            | This study |
| CHP247 | 5'-CGGTACCCGGGGATCCTCCAGCAGGGCCT<br>GGGTGGTCTCC-3'          | Construction of pEX19Gm <i>pctA-yfp</i>                                                             | This study |
| CHP248 | 5'-GGCCAGTGCCAAGCTTAGCGCCTGGACCA<br>GCAGATCGCCT-3'          | Construction of pEX18Gm <i>wspA-pctA</i>                                                            | This study |
| CHP249 | 5'-CGGTACCCGGGGATCCCACTCCGGCGGGA<br>ACAGCAGGGCG-3'          | Construction of pEX18Gm <i>wspA-pctA</i> and pEX18Gm <i>wspA-pctA-yfp</i>                           | This study |
| CHP250 | 5'-TTCGGCCATGCCGTTGAAACCGGTC-3'                             | Construction of pEX18Gm <i>wspA-pctA</i>                                                            | This study |
| CHP251 | 5'-AACGGCATGGCCGAACGTATCCATCGCTC<br>GATCCGGGAA-3'           | Construction of pEX18Gm <i>wspA-pctA</i>                                                            | This study |
| CHP252 | 5'-GACACGGTCACAGCCTCAGATCTTGAAGC<br>TGTCACCA-3'             | Construction of pEX18Gm <i>wspA-pctA</i>                                                            | This study |
| CHP253 | 5'-GGCTGTGACCGTGTCCCGCTCCACCG-3'                            | Construction of pEX18Gm <i>wspA-pctA</i>                                                            | This study |
| CHP270 | 5'-GACGAGCTGTACAAGTGAGGCTGTGACCG<br>TGTCCTCCGCTCCA-3'       | Construction of pEX18Gm <i>wspA-pctA-yfp</i>                                                        | This study |
| CHP292 | 5'-GCCACCGCCACCGCGACTTTGAAGCGGG<br>ATACGCCGTT-3'            | Construction of MINICTX2- <i>wspA-yfp</i> and MINICTX2- <i>wspA-5-yfp</i>                           | This study |
| CHP303 | 5'-AATTTGGATCCCGTGTCCGCCGGACCAG<br>CGAG-3'                  | Construction of pEX19Gm $\Delta$ <i>wspD</i>                                                        | This study |
| CHP304 | 5'-TTAAAAGCTTCGCTTCCGGCAGACCGGGA<br>GTCG-3'                 | Construction of pEX19Gm $\Delta$ <i>wspD</i>                                                        | This study |
| CHP322 | 5'-AGTGAACAAAGATGGTTGAGGCGAGCGA<br>AGGCCCTCTCTGCAAGCCGTA-3' | Construction of pEX19Gm $\Delta$ <i>wspD</i>                                                        | This study |
| CHP323 | 5'-TACGGCTTGACAGGAGGGCCTTCGCTCG<br>CCTCAACCATCTTTGTTCACT-3' | Construction of pEX19Gm $\Delta$ <i>wspD</i>                                                        | This study |
| CHP334 | 5'-AATTGGTACCTCAGACTTTGAAGCGGGAT<br>ACGCCGT-3'              | Construction of MINICTX2- <i>wspA</i> , MINICTX2- <i>wspA-5-yfp</i> and MINICTX2- <i>wspA-5</i>     | This study |
| CHP335 | 5'-TATAGGGCGAATTGGGTACTTACTTGATC<br>AGCTCGTCCATGCC-3'       | Construction of MINICTX2- <i>wspA-yfp</i> and MINICTX2- <i>wspA-5-yfp</i>                           | This study |
| CHP336 | 5'-                                                         | Construction of MINICTX2- <i>wspA-yfp</i> , MINICTX2- <i>wspA</i> ,                                 | This study |

|                     |                                                                 |                                                                                                                                                                                                                         |                                   |
|---------------------|-----------------------------------------------------------------|-------------------------------------------------------------------------------------------------------------------------------------------------------------------------------------------------------------------------|-----------------------------------|
|                     | TAGAACTAGTGGATCCAATCGCGCCCGT<br>TCCCGGCAT-3'                    | MINICTX2- <i>wspA</i> -5- <i>yfp</i> and MINICTX2- <i>wspA</i> -5                                                                                                                                                       |                                   |
| CHP337              | 5'-<br>GACCAACCTGCTCGCCCTGAACGCCGCCA<br>TCGA-3'                 | Construction of MINICTX2- <i>wspA</i> -5- <i>yfp</i>                                                                                                                                                                    | This study                        |
| CHP338              | 5'-<br>TCGATGGCGGGTTCAGGGCGAGCAGTT<br>GGTC-3'                   | Construction of MINICTX2- <i>wspA</i> -5- <i>yfp</i>                                                                                                                                                                    | This study                        |
| CHP339              | 5'-<br>AATTTGGTACCGGTCACCACCATCGTCAAG<br>GTCGCC-3'              | Construction of pEX19Gm $\Delta$ <i>wspB</i> (for <i>wspB</i> deletion in a background with WT <i>wspA</i> )                                                                                                            | This study                        |
| CHP340              | 5'-<br>AATTAAGCTTCCCAGTTCGTGCGCCGGGA<br>AGGAAT-3'               | Construction of pEX19Gm $\Delta$ <i>wspB</i> (for <i>wspB</i> deletion in a background with WT <i>wspA</i> ) and pEX19Gm $\Delta$ <i>wspB</i> (for <i>wspB</i> deletion in a background with <i>wspA</i> - <i>yfp</i> ) | This study                        |
| CHP341              | 5'-<br>GCTTCAAAGTCTGAGGCTGTGACCCCGGA<br>GTGCGGCGAGGGGACGGCA-3'  | Construction of pEX19Gm $\Delta$ <i>wspB</i> (for <i>wspB</i> deletion in a background with WT <i>wspA</i> )                                                                                                            | This study                        |
| CHP342              | 5'-<br>TGCCGTCGCCCTGCGCACTCCGGGGTAC<br>AGCCTCAGACTTTGAAGC-3'    | Construction of pEX19Gm $\Delta$ <i>wspB</i> (for <i>wspB</i> deletion in a background with WT <i>wspA</i> )                                                                                                            | This study                        |
| pctB_F              | 5'-<br>GCCATGGAATTCATGATCAAAAGTCTCAA<br>GTTTACGCCACAAG-3'       | Construction of pEX19Gm- <i>pctB</i> - <i>yfp</i>                                                                                                                                                                       | This study                        |
| pctB_R              | 5'-<br>GCTATCGGTACCGGATCTTGAAGCTGTC<br>CACCAGCTG-3'             | Construction of pEX19Gm- <i>pctB</i> - <i>yfp</i>                                                                                                                                                                       | This study                        |
| pctBdown_F          | 5'-<br>CGATAGTCTAGAGCACTGCCGAGCCGTA<br>GCCGAACCGCGGATAATC-3'    | Construction of pEX19Gm- <i>pctB</i> - <i>yfp</i>                                                                                                                                                                       | This study                        |
| pctBdown_R          | 5'-<br>GCCACAAAGCTTTCAGCCATAGCGGGGA<br>ACCTCGCCTCGCT-3'         | Construction of pEX19Gm- <i>pctB</i> - <i>yfp</i>                                                                                                                                                                       | This study                        |
| WspB-YFP-upR        | 5'-<br>GCAGGCGTTTGAAGCGATCGTTCATGCGG<br>TCACAGCCTCTAGAGTCGCG-3' | Construction of pEX19Gm $\Delta$ <i>wspB</i> (for <i>wspB</i> deletion in a background with <i>wspA</i> - <i>yfp</i> )                                                                                                  | (Guvener & Harwood, 2007)         |
| WspBdownF           | 5'-<br>CGCGACTCTAGAGGCTGTGACCGCATGAA<br>CGATCGCTTGAACGCCTGC-3'  | pEX19Gm $\Delta$ <i>wspB</i> (for <i>wspB</i> deletion in a background with <i>wspA</i> - <i>yfp</i> )                                                                                                                  | (Guvener & Harwood, 2007)         |
| <i>wspF</i> reverse | 5'-<br>NNGGATCCAGTGAGCGACGCACAGCCTC<br>TCC-3'                   | Construction of pEX18Gm <i>wspE</i> $\Delta$ REC in $\Delta$ <i>wspF</i> background                                                                                                                                     | This study/(Hickman et al., 2005) |



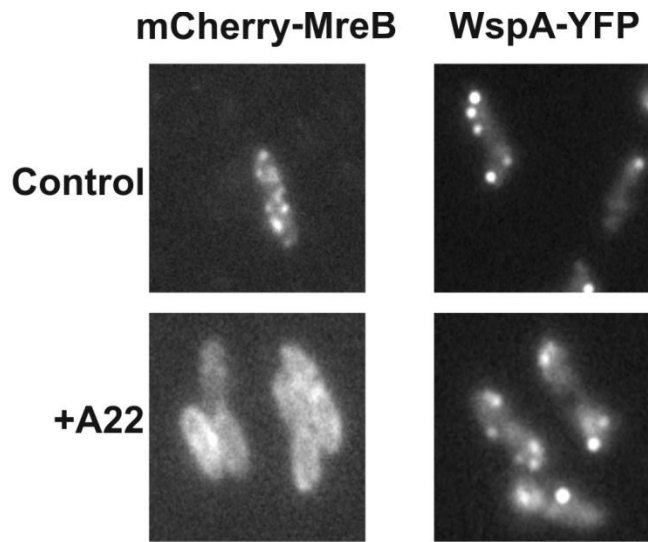

**Figure S1: Effect of A22 on MreB and WspA.** Cells were exposed to A22 prior to imaging. A22 disrupts MreB localization but has no effect on WspA localization.

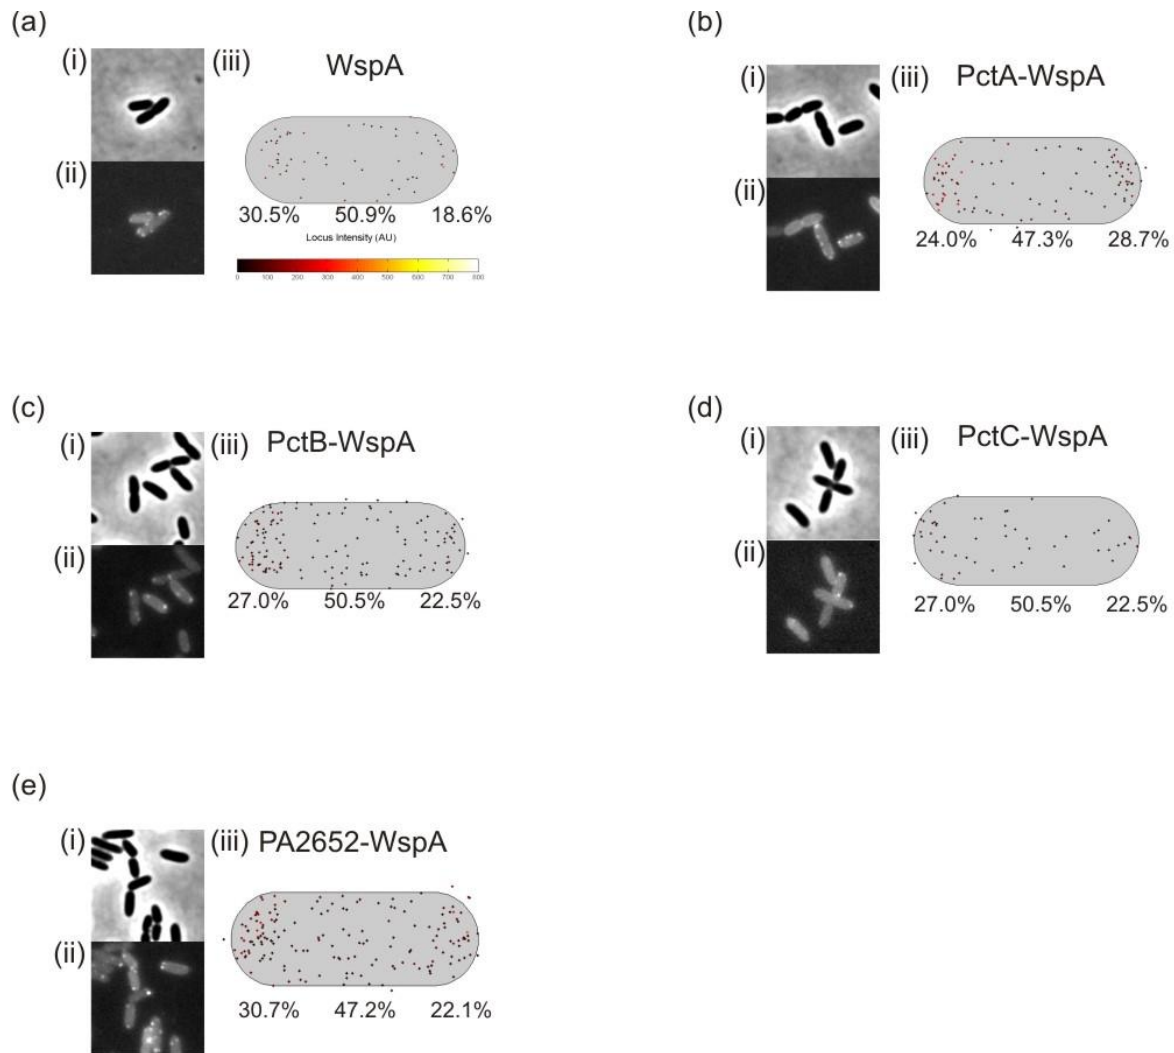

**Figure S2: Subcellular localization of chemoreceptor-WspA chimeras.** (A) wild-type WspA, (B) PctA-WspA, (C) PctB-WspA, (D) PctC-WspA, (E) PA2652-WspA. (i) Phase contrast, (ii) CFP (iii) Composite data showing the subcellular localization of clusters in a population of cells. The cell length and width represents the average cell size, the cluster intensity is represented by the locus intensity heat map, the brightest cluster in each cell was plotted. The proportion (%) of clusters found in the old (left) or new (right) cell pole or laterally localized is shown.

(A)

aatcgcgcccggtcccggcatggggacggggcgacattccctccgtgatgagcctgtctctcagaaaagtctggcttgccagttttcttctcttctgcccacactctggctcaaaaaagcctttccagcgctacaatagcgggaaaacccctatggcgctgcttgcgggtccggggacg  
gctatacagtcgcgcgattgacgggcccgttggtggcggcaggaacgaatccggactcgagtcctggggaaaaatgtgaagaactggactttcccgcaaatctggcaagtttcccgctgatcatcgcatcatgctgctgatggccgactactgctgacgtgaagatggtgacggtggaaaagg  
gcccctaccgtgtccaggacgacccatgcccgggatgtacttcatcagctggtagcagttcgtggaccgacaactacttgcagaccaggaactgttcggcataccgacgaccacgagctgagcaaggcccaggccgacagatcctccagcgaggagcgctggaccagcagatcgcc  
tctaccagaagaccatgaaccggacgagggcccgcaccacaggttctcgggtttccaggccgtcgaaggactactggagcagcacgacaaggctctcgagctttaccgagaagcgttcgaggaagcccggcaagctcgtcgggcccgttaccgagcactggcgcgagggcc  
gcaagtacctaaccagatgatcgagctgaacaaggacatcgccgatcgcctcggacaacatcgtaaacgggtggacgatccgaactgagcatgctgtagccctctgctggcgggtggtagccggcatctgcggttctcgtgctgaggcgatcaccagccgatccagaagatcg  
tccgagcctgacatgatggccgggtggcaccctaccgcacgcctgaacctcggccggcgtgacgaattcggcccatcgagaccggttcaacggcatgcccgaagagctcaaggccctggtgctcagggcccagcgttcttcgggtcaggtcaccacctcggtcaccgagatcgccgcacctc  
caagcagcagcagggccaccgccaccgaaaccgcccgcaccaccagagatcggcgcacctctcgcgagatcgcccacctcgcgcgacctggtcggaccatgagcgaagtctccggcgcggccgagcagcgcgacctggccggttccggccagttggcctggcgcgcatggagg  
aaacctgaccaccgtgatgggcgcccgaacctggtcaacgcaagctggcgtacctcaacgagaagccggcaacatcaaccaggtggtcaccacctcgtcaaggctcggaccagaccaacctgctcctgaacgcccgcctcagggcgaaagccggcgagtacggc  
cgcggttcgccgtggtggc <sup>aac</sup> <sup>cgg</sup> <sup>cag</sup>  
gacgaggtgccc <sup>gac</sup> <sup>gac</sup> <sup>gac</sup> accgcggtcggccactacgacatcgagcagatggtgcccagatccagctgcgggtatcgccggggtgatgggcatggacaagttctccgaggaggtcccgcggtatcgccaggtcggccaggt  
cggcgagcaactgctgcagatcatccagcaggtgagggcgtggcggcgggtgagatggtcaacgagggatgcagggccaggtaccggtcggcagcagatcaaccagggcgtggtgcaactgggcgaggccaccgggagaccgtggagtcgctgcggccagccagcttc  
gccatcgatgagctgaacctggtggcgaacgggctgcgcaacggcgtatcccgttcaaagtctga

(B)

MKNWTVRQRILASFAVIIAIMLLMAATAYVKMLTVEKGAYRVQDDAMPGMFITLVRSSWTDNYLQTQELFGITDDHELKAEADSLASEERLDQQIASYQKTMNPDEARDHELLAGFQAVRKDYLEQHDKVLLEYREKRFEEAGKLVAGPLTEHWREGRKYLNEMIELNKDIADRASNIVNAVDDAELSMVLVTLVAVVAGICGFLLRITQPIQKIVRSLDLMAGGDLTARLNLGRDEFGAIEGTFNGMAEELKGLVSQAQRSSVQVTTSVTEIAATSKQQQATATETAATTTEIGATSREIAATSRLVVRTMSEVSGAAEQSTLAGSGQLGLARMEETMHHVMGAADLVNAKLAILNEKAGNINQVVTIVKQVADQTNLLSALNAAIEAKAGEYGRGFAVVADDEVRLADRRTAVATYDIEQMVREIQSAVSAGVMGMDKFSSEVRRGIAEVGQVGEQLSQIIQQVQALAPRVQMVNEGMQAQATGAEQINQALVQLGEATGQTVESLRQASFAIDELNLVANGLRNGVSRFKV

**Figure S3: WspA-5 construction.** (A) Nucleotide sequence. Entire fragment cloned into MINICTX2 is shown, ORF in blue. The synthetic DNA region cloned into pUC57-3' *wspA-4* mutations is shown in italics. The arrow denotes the 5<sup>th</sup> mutation, which was introduced later by SOE PCR (B) Amino acid sequence of WspA-5. Red, underlined codons/amino acids show the locations of the mutations, the WT codon/amino acid is shown in bold, black text above.

### Supplemental References:

- Cowles, K. N. & Z. Gitai, (2010) Surface association and the MreB cytoskeleton regulate pilus production, localization and function in *Pseudomonas aeruginosa*. *Mol Microbiol* **76**: 1411-1426.
- Guvener, Z. T. & C. S. Harwood, (2007) Subcellular location characteristics of the *Pseudomonas aeruginosa* GGDEF protein, WspR, indicate that it produces cyclic-di-GMP in response to growth on surfaces. *Mol Microbiol* **66**: 1459-1473.
- Guvener, Z. T., D. F. Tifrea & C. S. Harwood, (2006) Two different *Pseudomonas aeruginosa* chemosensory signal transduction complexes localize to cell poles and form and remould in stationary phase. *Mol Microbiol* **61**: 106-118.
- Hickman, J. W., D. F. Tifrea & C. S. Harwood, (2005) A chemosensory system that regulates biofilm formation through modulation of cyclic diguanylate levels. *Proc Natl Acad Sci U S A* **102**: 14422-14427.
- Hoang, T. T., R. R. Karkhoff-Schweizer, A. J. Kutchma & H. P. Schweizer, (1998) A broad-host-range Flp-FRT recombination system for site-specific excision of chromosomally-located DNA sequences: application for isolation of unmarked *Pseudomonas aeruginosa* mutants. *Gene* **212**: 77-86.
- Hoang, T. T., A. J. Kutchma, A. Becher & H. P. Schweizer, (2000) Integration-proficient plasmids for *Pseudomonas aeruginosa*: site-specific integration and use for engineering of reporter and expression strains. *Plasmid* **43**: 59-72.
- Parkinson, J. S., (1978) Complementation analysis and deletion mapping of *Escherichia coli* mutants defective in chemotaxis. *J Bacteriol* **135**: 45-53.
- Simon, R., U. Priefer & A. Puhler, (1983) A broad host range mobilization system for in vivo genetic engineering: transposon mutagenesis in Gram negative bacteria. *Bio/Technology* **1**: 784-789.

Stover, C. K., X. Q. Pham, A. L. Erwin, S. D. Mizoguchi, P. Warrenner, M. J. Hickey, F. S. Brinkman, W. O. Hufnagle, D. J. Kowalik, M. Lagrou, R. L. Garber, L. Goltry, E. Tolentino, S. Westbrook-Wadman, Y. Yuan, L. L. Brody, S. N. Coulter, K. R. Folger, A. Kas, K. Larbig, R. Lim, K. Smith, D. Spencer, G. K. Wong, Z. Wu, I. T. Paulsen, J. Reizer, M. H. Saier, R. E. Hancock, S. Lory & M. V. Olson, (2000) Complete genome sequence of *Pseudomonas aeruginosa* PAO1, an opportunistic pathogen. *Nature* **406**: 959-964.

Wolfe, A. J., M. P. Conley, T. J. Kramer & H. C. Berg, (1987) Reconstitution of signaling in bacterial chemotaxis. *J Bacteriol* **169**: 1878-1885.
